# Supplementary material for: Molecularly-induced roughness and oxidation in cobalt/organodithiol/cobalt nanolayers synthesized by sputter-deposition and molecular sublimation
Source: Royal Society of Chemistry journal article supplement (doi:10.1039/d3dt01910a), 2024-01-01
Supplement: d3dt01910a1.pdf [file d3dt01910a1.pdf]

### Supplementary Information

*Molecularly-induced roughness and oxidation in cobalt/organodithiol/cobalt nanolayers synthesized by sputter-deposition and molecular sublimation*, Rowe, Shanmugam, Greczynski,

Hultman, le Febvrier, Eklund, Ramanath

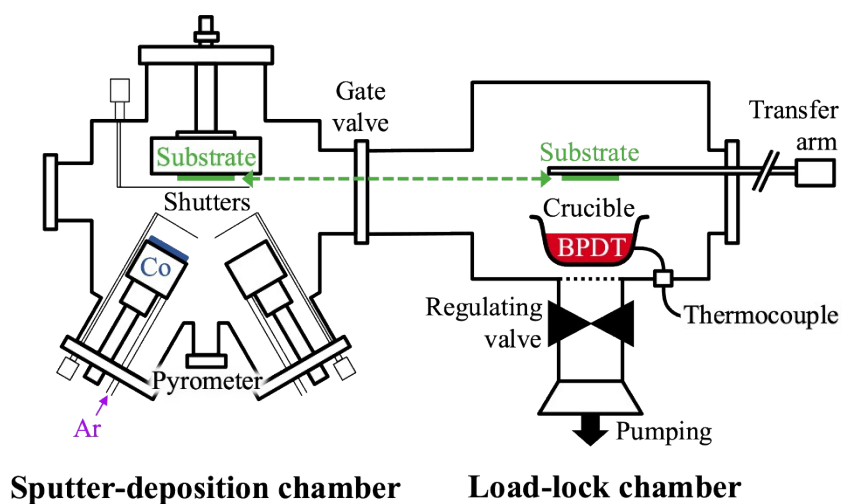

**Fig. S1.** Schematic of the ultra-high vacuum chamber used for metal sputter-deposition<sup>1</sup> with attached load-lock chamber containing a crucible for subliming BPDT flux for MNL formation.

The schematic is not to scale.

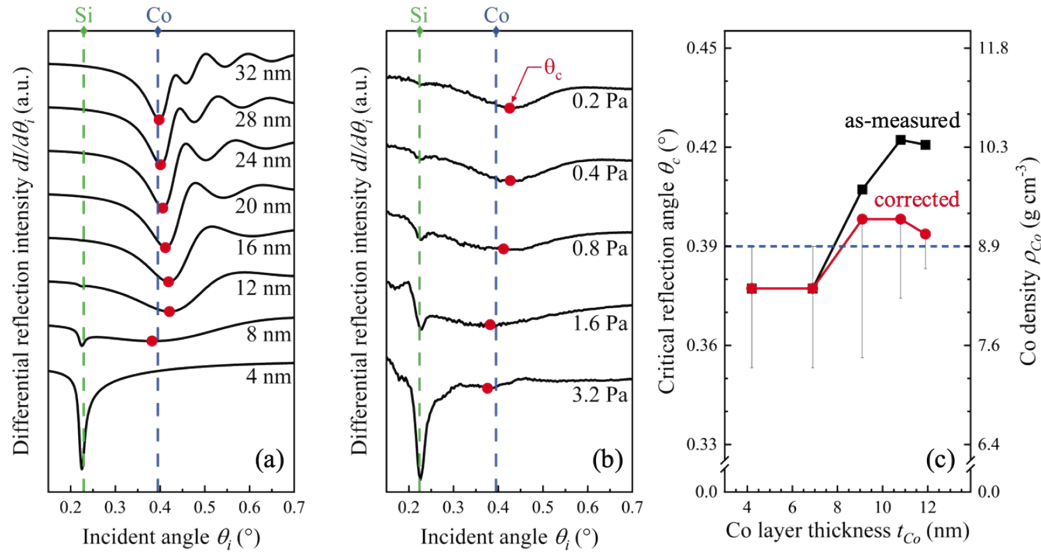

**Fig. S2.** (a) Differential XRR intensity from the first Co layer deposited on Si at different  $p_{Ar}$ . Red points indicate the  $dI/d\theta$  minima corresponding to  $\theta_c$  for Co. (b) Representative simulations assuming a constant  $\rho_{Co}$  showing  $\theta_c$  shifts with  $t_{Co}$  due to Kiessig interference. Dashed vertical lines indicate  $\theta_c$  for bulk Co and Si. (c) As-measured  $\theta_c$  (squares) and corrected  $\theta_c$  (circles) and associated  $\rho_{Co}$  plotted versus  $t_{Co}$ . The horizontal dashed line denotes  $\rho_{Co}$  and  $\theta_c$  for bulk Co.

XRR data fits with Kiessig fringes simulations of model Co/SiO<sub>2</sub>/Si structures were insensitive to  $\rho_{Co}$ . We thus determined  $\rho_{Co}$  from the total external reflection angle<sup>2-4</sup>  $\theta_c$  identified by the  $dI/d\theta$  minimum for the Co layer. Down shifts in  $\theta_c$  with decreasing  $t_{Co}$  are expected because the Co layer thicknesses ( $4 \leq t_{Co} \leq 12$  nm) on the lower refractive index SiO<sub>2</sub>/Si substrate are comparable to the X-ray attenuation depth  $d_{1/e} \sim 6.6$  nm for bulk Co at  $\theta_c$ . The  $\theta_c$  up-shifts (Fig. S2a) are due to  $t_{Co}$ -dependent low-order Kiessig fringe interference with the  $dI/d\theta$  minimum. XRR intensity simulations for Co layers with *constant* bulk densities but different thicknesses  $t_{Co}$  show  $\theta_c$  up-shifts (Fig. S2b) which incorrectly imply that  $\rho_{Co}$  relates to  $t_{Co}$ . To correct for this Kiessig interference-induced  $\theta_c$  up-shift artifact, we determined the difference between the simulated  $\theta_c$

values for a constant bulk density, and  $\theta_c$  calculated from

$$\rho_{Co} = \frac{\theta_c^2 \pi M_A}{N_A r_e \lambda^2 f_1'} \quad (M_A = \text{atomic mass, } N_A = \text{Avogadro number, } r_e = \text{classical electron radius, } \lambda = \text{X-ray wavelength, and } f_1' = \text{real part of the})$$

atomic scattering factor). This correction was then applied to measured  $\theta_c$  and plotted as a function of  $t_{Co}$  determined from Kiessig fringe simulations which are insensitive to  $\rho_{Co}$  (Fig. S2c).

---

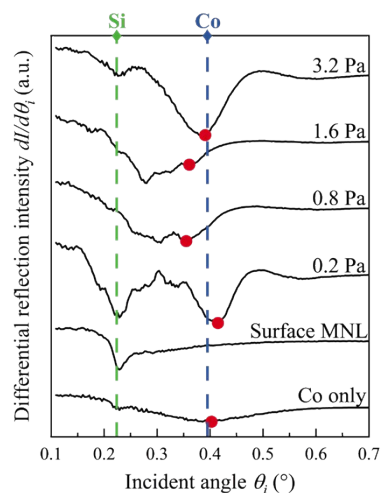

**Fig. S3.** Differential XRR intensity from Co/BPDT MNL/Co sandwiches with the top Co layer deposited at different  $p_{Ar}$ . The red points show the calculated  $\theta_c$  by  $dI/d\theta$  minima in the region expected for Co.

---

We determined  $\theta_c$  using  $dI/d\theta$  minima in differential XRR intensity characteristics from Co/BPDT MNL/Co sandwiches (Fig. S3). However, simulations from idealized layers Co/MNL/Co model structures were inadequate to capture the features of the measured data due to several factors such as surface Co oxidation and roughening (Fig. 6).

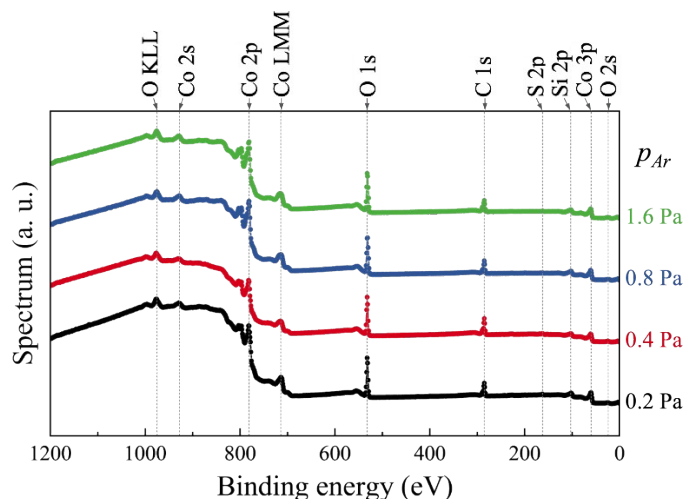

**Fig. S4.** Representative XPS survey spectra for variable  $p_{Ar}$  with the most prominent peaks labeled. Measurements were collected with the surface-to-detector angle  $\theta_{SD} = 30^\circ$ .

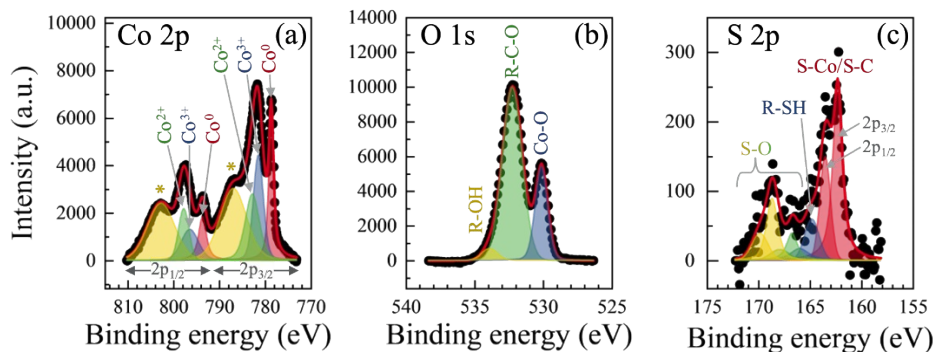

**Fig. S5.** Example XPS spectra in the vicinity of the (a) Co 2p, (b) O 1s and (c) S 2p bands, shown along with the detailed sub-band peak fits used to identify the chemical states. The  $2p_{3/2}$  and  $2p_{1/2}$  sub-bands associated with Co and S chemical states are shown where applicable. “\*” denotes the Co satellite peak.

### Supplementary References

1. A. le Febvrier, L. Landälv, T. Liersch, D. Sandmark, P. Sandström, P. Eklund, *Vacuum*, 2021, **187**, 110137.
2. L. G. Parratt, *Physical Review*, 1954, **95**, 359-369.
3. M. Saito, S. Sato, Y. Waseda, *High Temperature Materials and Processes*, 1998, **17**, 117-132.
4. B. L. Henke, E. M. Gullikson, J. C. Davis, *Atomic Data and Nuclear Data Tables*, 1993, **54**, 181-342.
